# Supplementary material for: Intradermal Inoculation of Inactivated Foot-and-Mouth Disease Vaccine Induced Effective Immune Responses Comparable to Conventional Intramuscular Injection in Pigs
Source: MDPI journal article supplement (doi:10.3390/vaccines12020190), 2024-02-13

1 dpv

14 dpv  
(secondary vaccination)

15 dpv

35 dpv

Conventional  
IM no.1

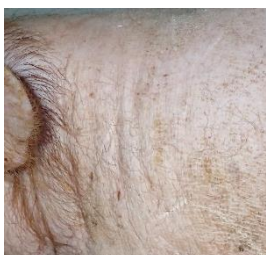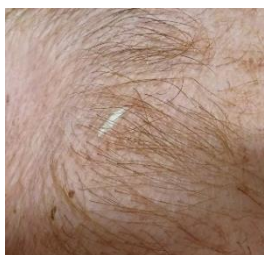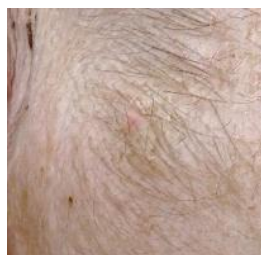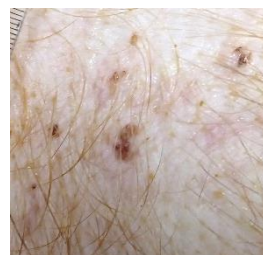

Conventional  
IM no.2

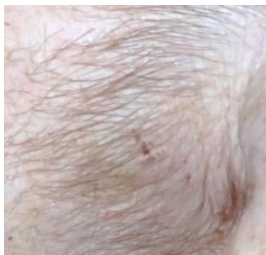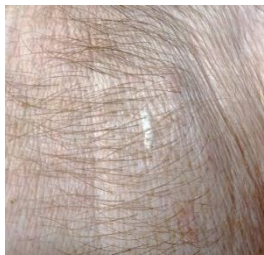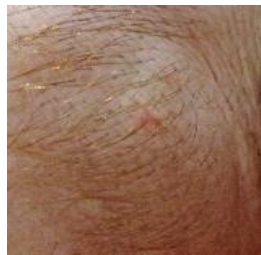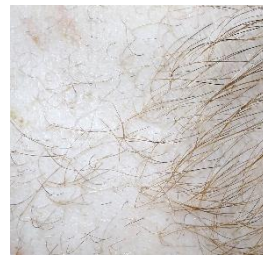Conventional  
IM no.3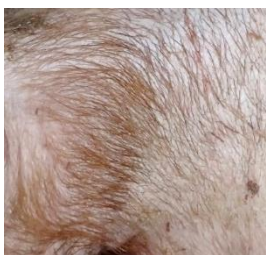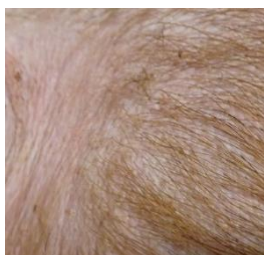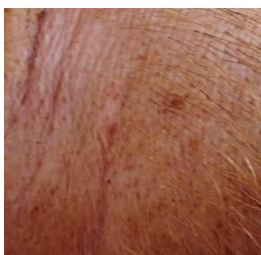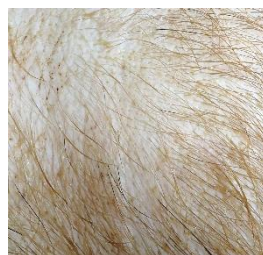

Conventional  
ID no.1

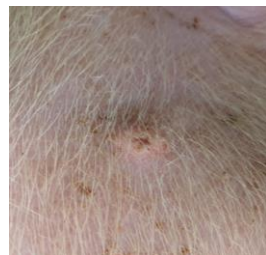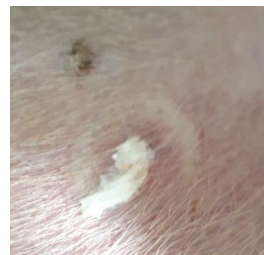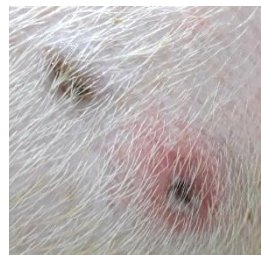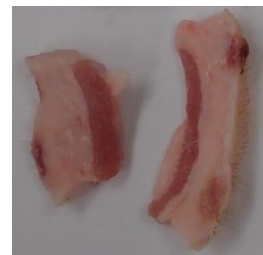

Conventional  
ID no.2

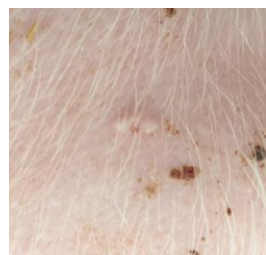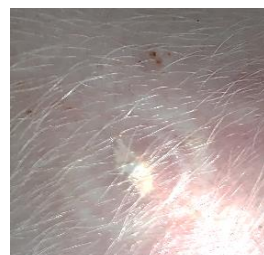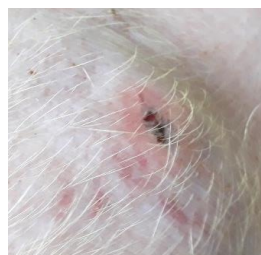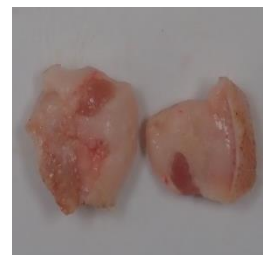

Conventional  
ID no.3

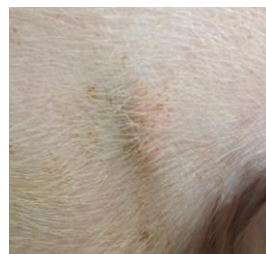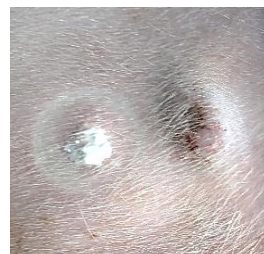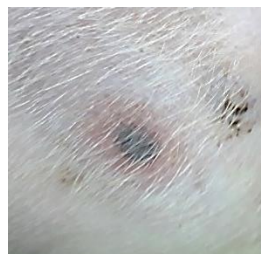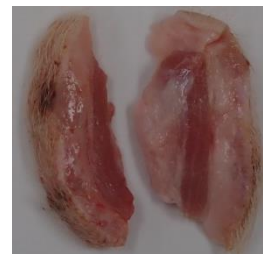

Supplement: s1 [file s1]
