# Supplementary figures and images for: Intradermal Inoculation of Inactivated Foot-and-Mouth Disease Vaccine Induced Effective Immune Responses Comparable to Conventional Intramuscular Injection in Pigs
Source: MDPI journal article supplement (doi:10.3390/vaccines12020190), 2024-02-13

Conventional  
pigs

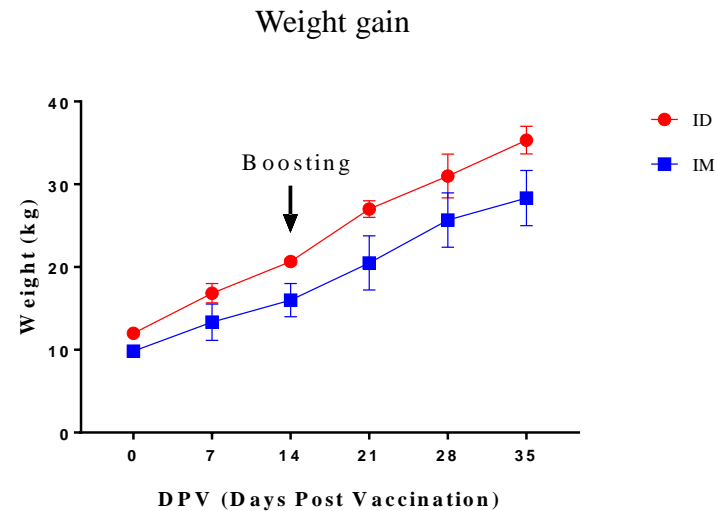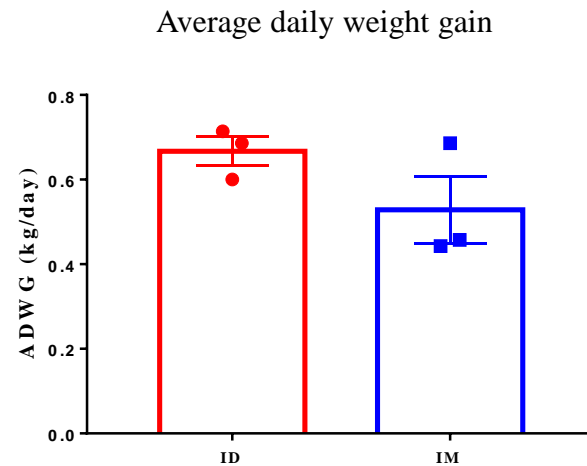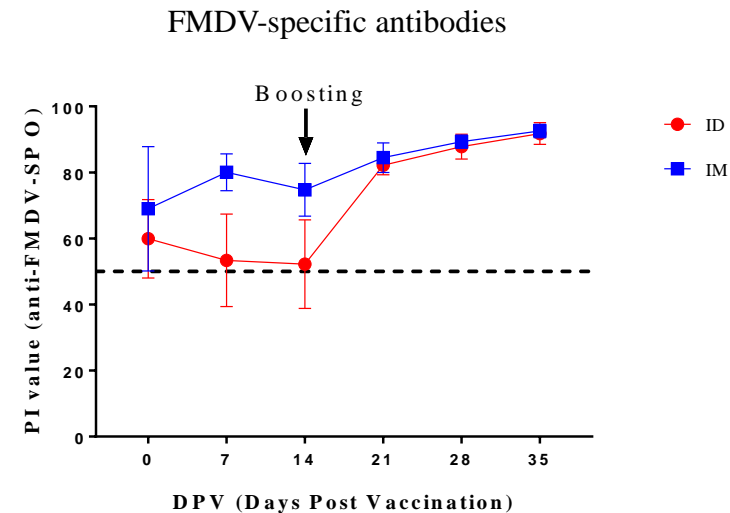

Supplement: s1 [file s1]

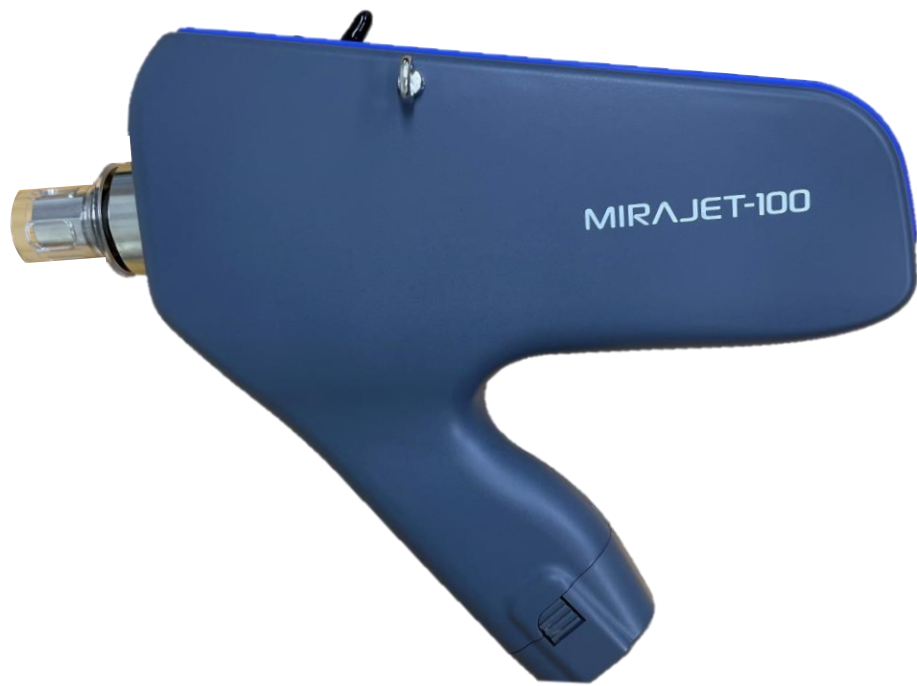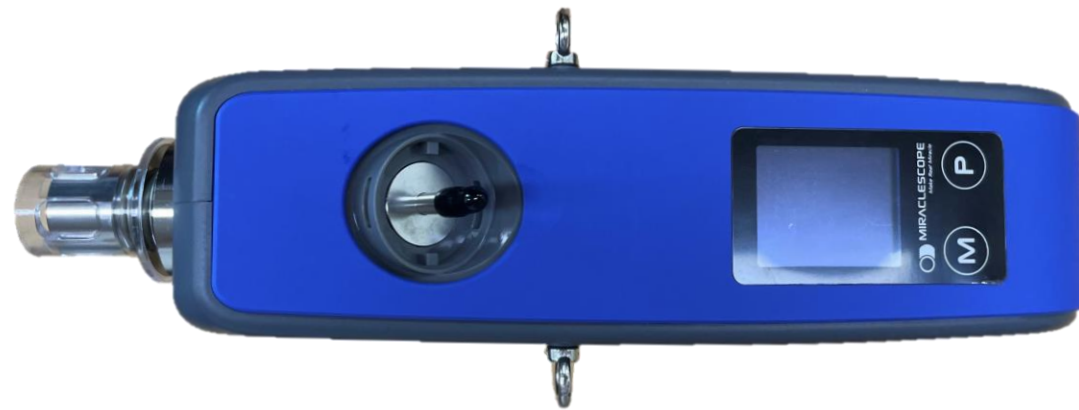

Supplement: s1 [file s1]
